# Supplementary material
Source: PubMed Central journal article supplement (PMC7057174)
Supplement: jamacardiol-5-532-s002.pdf [file jamacardiol-5-532-s002.pdf]

## Supplementary Online Content

Fanaroff AC, Peterson ED, Kaltenbach LA, et al. Agreement and accuracy of medication persistence identified by patient self-report vs pharmacy fill: a secondary analysis of the cluster randomized ARTEMIS trial. *JAMA Cardiol*. Published online March 4, 2020.  
doi:10.1001/jamacardio.2020.0125

**eTable 1.** Baseline Characteristics of the Population With and Without a Prescription Fill in the Symphony Health Database

**eTable 2.** Baseline Patient Characteristics

**eTable 3.** Twelve-Month Kaplan-Meier Event Rates by Patient Reported and Pharmacy Fill Persistence

**eFigure 1.** Agreement Between Patient Report and Pharmacy Fill

**eFigure 2.** Agreement Between Patient Report, Pharmacy Fill, and Voucher Use in Intervention Arm Patients Who Used the Voucher at Least Once

This supplementary material has been provided by the authors to give readers additional information about their work.

**eTable 1.** Baseline Characteristics of the Population With and Without a Prescription Fill in the Symphony Health Database

|                              | <b>Pharmacy-linked study population<br/>(n = 8,373)</b> | <b>No pharmacy linkage<br/>(n = 1,729)</b> |
|------------------------------|---------------------------------------------------------|--------------------------------------------|
| <b>Demographics</b>          |                                                         |                                            |
| Median Age                   | 62 (54, 70)                                             | 62 (54, 70)                                |
| Male sex                     | 5,664 (67.7)                                            | 1,211 (70.0)                               |
| Non-white race               | 990 (11.8)                                              | 201 (11.6)                                 |
| <b>Medical History</b>       |                                                         |                                            |
| Prior MI                     | 1,713 (20.5)                                            | 347 (20.1)                                 |
| Diabetes                     | 2,734 (32.7)                                            | 551 (31.9)                                 |
| Hypertension                 | 5,763 (68.8)                                            | 1,215 (70.3)                               |
| Previously missed medication |                                                         |                                            |
| Never                        | 4,228 (50.5)                                            | 892 (51.6)                                 |
| 1-3 times per month          | 3,032 (36.2)                                            | 609 (35.2)                                 |
| Once per week or more        | 824 (9.8)                                               | 164 (9.5)                                  |
| <b>Index hospitalization</b> |                                                         |                                            |
| STEMI                        | 3,847 (46.0)                                            | 791 (45.7)                                 |
| PCI performed                | 7,467 (89.2)                                            | 1,536 (88.8)                               |

**eTable 2.** Baseline Patient Characteristics

|                              | <b>Measurement Cohorts</b>      |                                        |                                  |                                 |
|------------------------------|---------------------------------|----------------------------------------|----------------------------------|---------------------------------|
|                              | <b>Overall<br/>(n = 10,102)</b> | <b>Pharmacy-linked<br/>(n = 8,373)</b> | <b>Voucher Use<br/>(n=3,705)</b> | <b>Phlebotomy<br/>(n = 944)</b> |
| <b>Demographics</b>          |                                 |                                        |                                  |                                 |
| Median Age                   | 62 (54, 70)                     | 62 (54, 70)                            | 61 (53, 69)                      | 64 (55, 71)                     |
| Male sex                     | 6,875 (68.1)                    | 5,664 (67.7)                           | 2604 (70.3)                      | 646 (68.4)                      |
| Non-white race               | 1,191 (11.8)                    | 990 (11.8)                             | 325 (8.8)                        | 79 (8.4)                        |
| <b>Medical History</b>       |                                 |                                        |                                  |                                 |
| Prior MI                     | 2,060 (20.4)                    | 1713 (20.5)                            | 663 (17.9)                       | 195 (20.7)                      |
| Prior PCI                    | 2,562 (25.4)                    | 2,123 (25.4)                           | 811 (21.9)                       | 244 (25.9)                      |
| Prior CABG                   | 1,128 (11.2)                    | 925 (11.1)                             | 335 (9.0)                        | 120 (12.7)                      |
| Prior stroke or TIA          | 680 (6.7)                       | 550 (6.6)                              | 183 (4.9)                        | 45 (4.8)                        |
| Peripheral arterial disease  | 634 (6.3)                       | 519 (6.2)                              | 167 (4.5)                        | 66 (7.0)                        |
| Prior HF                     | 784 (7.8)                       | 649 (7.8)                              | 200 (5.4)                        | 66 (7.0)                        |
| Diabetes                     | 3,285 (32.5)                    | 2,734 (32.7)                           | 1073 (29.0)                      | 312 (33.1)                      |
| Hypertension                 | 6,978 (69.1)                    | 5,763 (68.8)                           | 2398 (64.7)                      | 671 (71.1)                      |
| Depression                   | 1,166 (11.5)                    | 961 (11.5)                             | 391 (10.6)                       | 116 (12.3)                      |
| Previously missed medication |                                 |                                        |                                  |                                 |
| Never                        | 5,120 (50.7)                    | 4,228 (50.5)                           | 1955 (52.8)                      | 467 (49.5)                      |
| 1-3 times per month          | 3,641 (36.0)                    | 3,032 (36.2)                           | 1278 (34.5)                      | 358 (37.9)                      |
| Once per week or more        | 988 (9.8)                       | 824 (9.8)                              | 310 (8.4)                        | 88 (9.3)                        |
| <b>Index hospitalization</b> |                                 |                                        |                                  |                                 |
| STEMI                        | 4,638 (45.9)                    | 3,847 (46.0)                           | 1779 (48.0)                      | 457 (48.4)                      |
| Multivessel CAD              | 4,687 (46.4)                    | 3,868 (46.2)                           | 1718 (46.4)                      | 414 (43.9)                      |
| PCI performed                | 9,003 (89.1)                    | 7,467 (89.2)                           | 3430 (92.6)                      | 855 (90.6)                      |
| CABG                         | 154 (1.5)                       | 125 (1.5)                              | 40 (1.1)                         | 17 (1.8)                        |
| Median Length of stay        | 2 (2, 3)                        | 2 (2, 3)                               | 2 (2, 3)                         | 2 (2, 3)                        |

**eTable 3.** Twelve-Month Kaplan-Meier Event Rates by Patient Reported and Pharmacy Fill Persistence

|                       | <b>Concordantly persistent<br/>(n = 4185)</b> |                             | <b>Concordantly non-persistent<br/>(n = 1131)</b> |                             | <b>Discordant:<br/>Patient report<br/>persistent, pharmacy<br/>fill non-persistent<br/>(n = 2911)</b> |                             | <b>Discordant:<br/>Patient report non-<br/>persistent, pharmacy fill<br/>persistent<br/>(n = 146)</b> |                             |
|-----------------------|-----------------------------------------------|-----------------------------|---------------------------------------------------|-----------------------------|-------------------------------------------------------------------------------------------------------|-----------------------------|-------------------------------------------------------------------------------------------------------|-----------------------------|
|                       | <b>N<br/>events</b>                           | <b>KM rate<br/>(95% CI)</b> | <b>N<br/>events</b>                               | <b>KM rate<br/>(95% CI)</b> | <b>N<br/>events</b>                                                                                   | <b>KM rate<br/>(95% CI)</b> | <b>N<br/>events</b>                                                                                   | <b>KM rate<br/>(95% CI)</b> |
| MACE                  | 338                                           | 8.2<br>(7.4-9.0)            | 200                                               | 18.3<br>(16.0-20.6)         | 283                                                                                                   | 9.7<br>(8.7-10.8)           | 21                                                                                                    | 14.6<br>(8.8-20.3)          |
| All-cause death       | 137                                           | 3.3<br>(2.7-3.8)            | 87                                                | 7.7<br>(6.1-9.3)            | 62                                                                                                    | 2.1<br>(1.6-2.7)            | 10                                                                                                    | 6.9<br>(2.8-11.0)           |
| Myocardial infarction | 230                                           | 5.6<br>(4.9-6.3)            | 128                                               | 11.8<br>(9.9-13.8)          | 216                                                                                                   | 7.5<br>(6.5-8.4)            | 13                                                                                                    | 9.3<br>(4.5-14.2)           |
| Stroke                | 23                                            | 0.6<br>(0.3-0.8)            | 18                                                | 1.7<br>(0.9-2.5)            | 27                                                                                                    | 0.9<br>(0.6-1.3)            | 1                                                                                                     | 0.7<br>(0-2.1)              |

**eFigure 1: Agreement Between Patient Report and Pharmacy Fill**

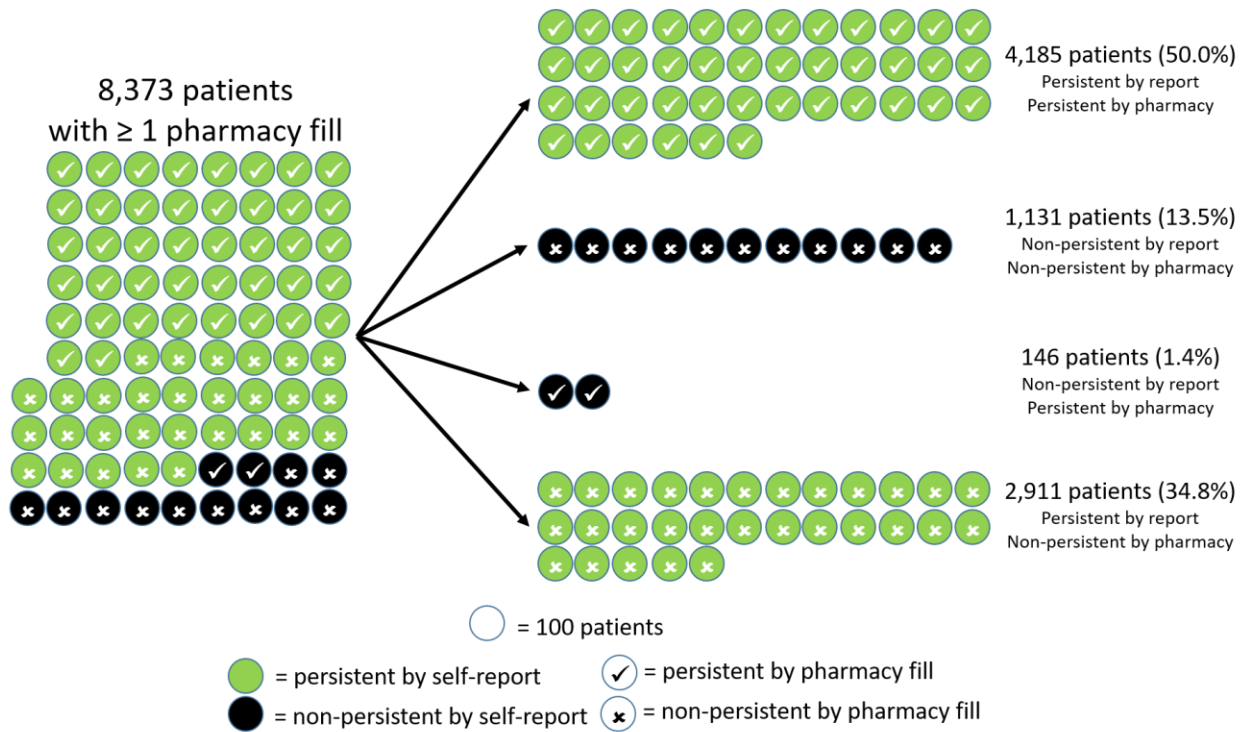

In 8,373 patients, persistence could be measured by both self-report and pharmacy fill data. Among these patients, 63.5% were either persistent or non-persistent by both metrics and the remaining 36.5% were discordant.

**eFigure 2. Agreement Between Patient Report, Pharmacy Fill, and Voucher Use in Intervention Arm Patients Who Used the Voucher at Least Once**

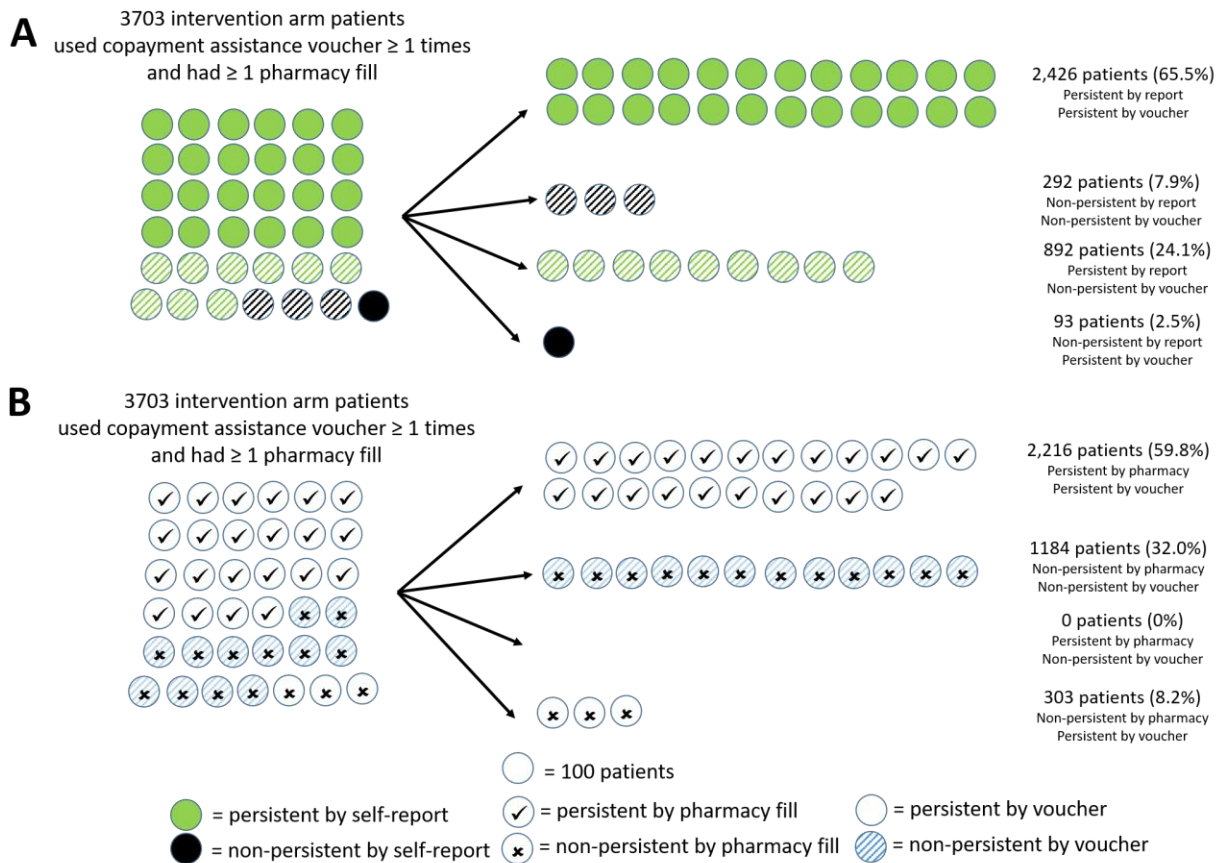

Persistence data from voucher use combined with pharmacy fill was used as a nominal gold standard in intervention arm patients who used a copayment assistance voucher at least once. Overall, persistence by voucher use combined with pharmacy fill and voucher use was 68.0%. Panel A shows persistence as measured by self-report compared with combined voucher use and pharmacy fill data; 26.9% of patients self-reporting persistence were non-persistent by both voucher use and pharmacy fill data; 24.1% of patients self-reporting non-persistence were persistent by either voucher use or pharmacy fill data. Panel B shows persistence as measured by pharmacy fill alone compared with combined voucher use and pharmacy fill data; 20.3% of patients classified as non-persistent by pharmacy fill data were persistent by voucher use data.
